# Supplementary material for: The Periodontopathic Pathogen, Porphyromonas gingivalis, Involves a Gut Inflammatory Response and Exacerbates Inflammatory Bowel Disease
Source: MDPI journal article supplement (doi:10.3390/pathogens11010084), 2022-01-11
Supplement: s1 [file s1]

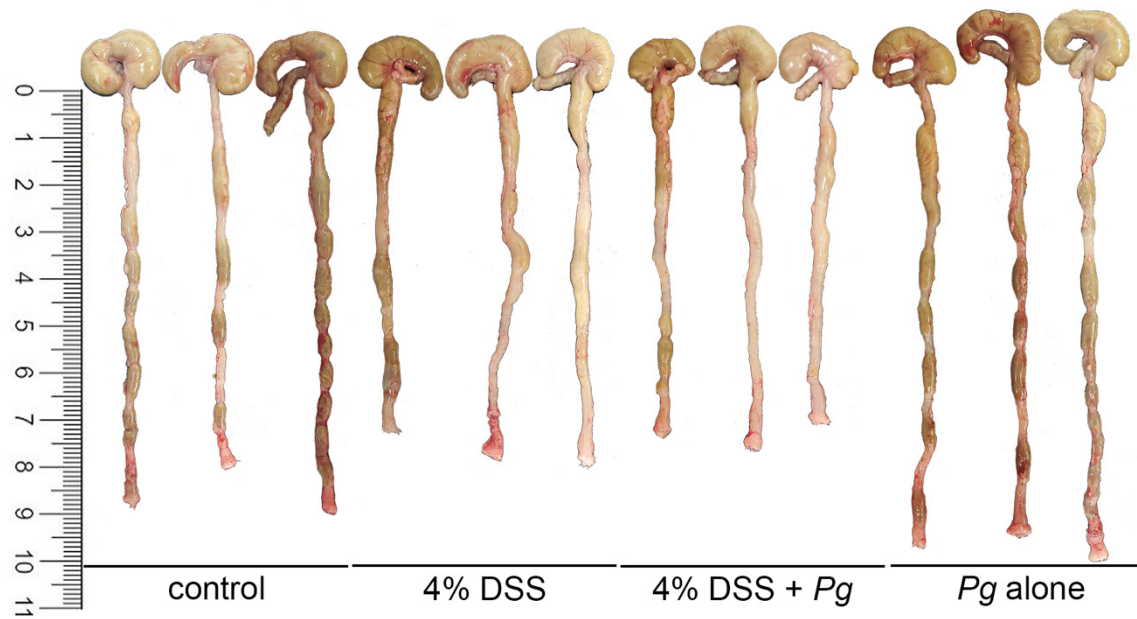

**Figure S1.** The picture of all the colons in each group. (A) Dissected colons of control group. The lengths were 9.0 cm, 8.34 cm, and 9.04 cm, respectively. (B) Dissected colons of 4% DSS treated group. The lengths were 7.58 cm, 8.58 cm, and 7.92 cm, respectively. (C) Dissected colons of 4% DSS plus *Pg* group. The lengths were 7.06 cm, 7.65 cm, and 7.18 cm, respectively. (D) Dissected colons of *Pg* alone group. The lengths were 9.77 cm, 9.27 cm, and 10.09 cm, respectively. DSS, dextran sulfate sodium; *Pg*, *Porphyromonas gingivalis*.
